# Supplementary material for: The sGC Activator Runcaciguat Has Kidney Protective Effects and Prevents a Decline of Kidney Function in ZSF1 Rats
Source: MDPI journal article supplement (doi:10.3390/ijms241713226), 2023-08-25
Supplement: s1 [file s1]

**Supplementary information:**

**Suppl. Figure S1**

**Staining of oxidative stress by 8OH DG in kidney biopsies from ZSF1 rats**

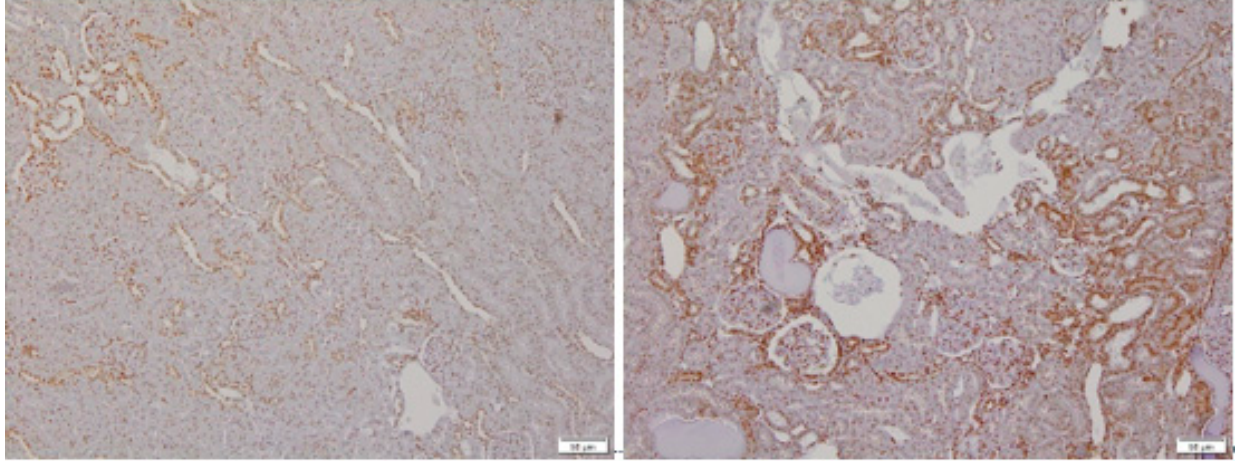

Immuno-staining for 8-OH-dG (8 hydroxy-deoxy-guanosine) performed on kidney biopsies of or male lean control rat (left) or male obese ZSF1 rat (right) rat at the age of 25W. 8-OH-dG stands as marker of oxidative stress damage and repair.

## Suppl. Figure S2

### Effects of runcaciguat on oral glucose tolerance test (oGTT) in obese ZSF1 rats

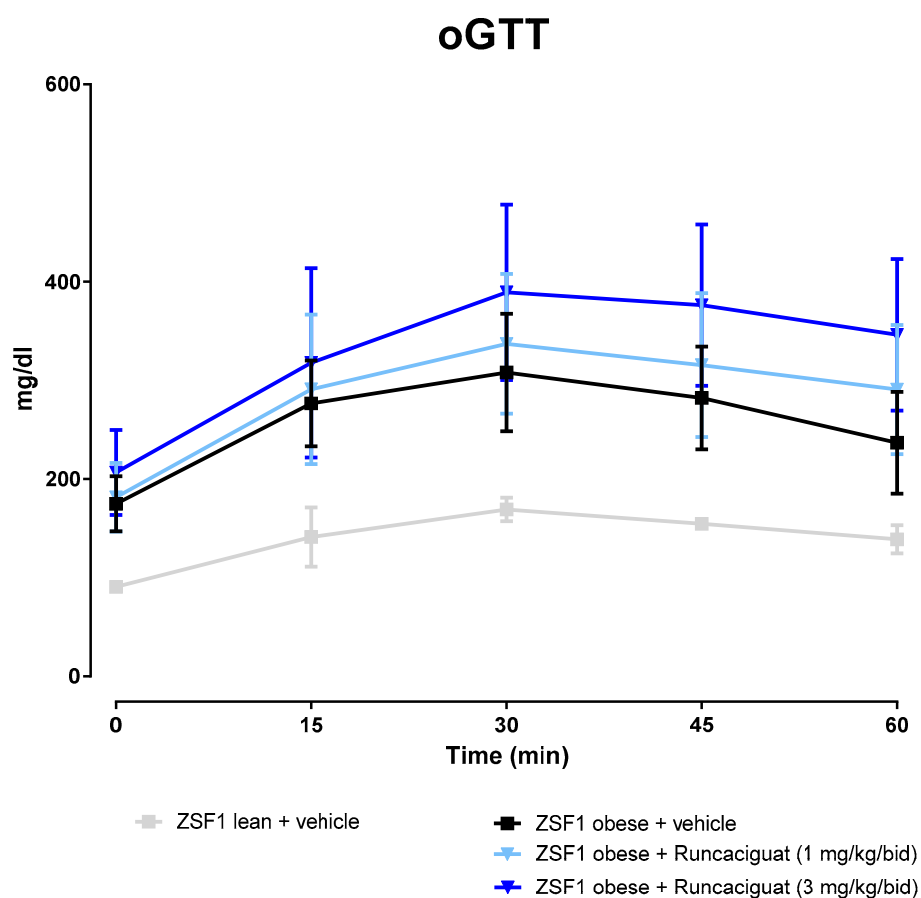

Blood glucose levels in conscious ZSF1 lean and ZSF1 obese rats in [mg/dl] after oral glucose bolus with 1 g/kg at 0 min at 0, 15, 30, 45 and 60 minutes after glucose challenge. Rats were chronically treated with vehicle (placebo), 1 mg/kg and 3 mg/kg runcaciguat for 12 weeks. Data are mean  $\pm$  SEM with  $n=6$  in ZSF1 lean and  $n=10$  in ZSF1 obese in each group. No significant changes within the ZSF1 obese groups could be detected.

**Suppl. Table S1:****Effects of runcaciguat on fasting blood glucose levels in obese ZSF1 rats**

| Treatment                  | Vehicle | Runcaciguat<br>3 mg/kg bid | Runcaciguat<br>10 mg/kg bid |
|----------------------------|---------|----------------------------|-----------------------------|
| Fasted glucose<br>[mmol/l] | 19.3    | 14.22**                    | 12.91****                   |
| SEM                        | 0.70    | 1.06                       | 1.51                        |

Fasting blood glucose levels in conscious ZSF1 obese rats in [mmol/l], treated with either runcaciguat or vehicle. Rats were chronically treated with vehicle (placebo), 3 mg/kg and 10 mg/kg runcaciguat for 12 weeks. Data are mean  $\pm$  SEM with n=10 in each group. Significant changes by treatment with runcaciguat were determined by one-way ANOVA followed by Tuckey's multiple comparison test with \*/\*\*/\*\*\*/\*\*\*\*/ for P < 0.05/0.01/0.001/0.0001.

**Suppl. Table S2****Effects of runcaciguat on body weight development in ZSF1 rats**

| Treatment       | Vehicle | Runcaciguat<br>1 mg/kg/ bid | Runcaciguat<br>3 mg/kg bid | Runcaciguat<br>10 mg/kg bid |
|-----------------|---------|-----------------------------|----------------------------|-----------------------------|
| Body weight [g] | 619     | 619                         | 641                        | 619                         |
| SEM             | 14      | 15                          | 16                         | 9                           |

Change of body weight in conscious obese ZSF1 rats of runcaciguat treated rats versus vehicle. Rats were chronically treated with either vehicle (placebo), 1 mg/kg, 3 mg/kg and 10 mg/kg runcaciguat for 12 weeks. Data are mean  $\pm$  SEM. No significant changes by treatment with runcaciguat were determined.
