# Supplementary material for: The sGC Activator Runcaciguat Has Kidney Protective Effects and Prevents a Decline of Kidney Function in ZSF1 Rats
Source: Int J Mol Sci. 2023 Aug 25;24(17):13226. doi: 10.3390/ijms241713226 (PMC10488129; doi:10.3390/ijms241713226)
Supplement: Supplementary file 1 [file ijms-24-13226-s001.zip › ijms-2532868-supplementary table S3.xlsx]

## Sheet: SuppTable_GeneExpressionHeatmap
Supplementary table 2: Transcript identification and expression ratios for the heatmap presented in Fig. 13. For abbreviations s. below the table.
Genes with increased expression in kidney after Runcaciguat treatment of ZSF1 obese rats
Probeset_ID	Gene Description	Gene Symbol	ZSF1lean-vs-ZSF1ob_wk14, An28	ZSF1lean-vs-ZSF1ob_wk14, An27	ZSF1lean-vs-ZSF1ob_wk14, An29	ZSF1lean-vs-ZSF1ob_wk14, An30	ZSF1lean-vs-ZSF1ob_wk14, An26	ZSF1lean-vs-ZSF1ob_wk22, An24	ZSF1lean-vs-ZSF1ob_wk22, An23	ZSF1lean-vs-ZSF1ob_wk22, An22	ZSF1lean-vs-ZSF1ob_wk22, An21	ZSF1lean-vs-ZSF1ob_wk22, An25	ZSF1lean-vs-ZSF1ob_wk26, An20	ZSF1lean-vs-ZSF1ob_wk26, An18	ZSF1lean-vs-ZSF1ob_wk26, An19	ZSF1lean-vs-ZSF1ob_wk26, An16	ZSF1lean-vs-ZSF1ob_wk26, An17	Runca(ZSF1ob)-vs-ZSF1ob, An44	Runca(ZSF1ob) vs ZSF1ob, An46	Runca(ZSF1ob) vs ZSF1ob, An45	Runca(ZSF1ob) vs ZSF1ob, An50
TC0500003017.rn.1	"microRNA 466h, microRNA 466h (Mir466h), microRNA."	Mir466h	1.31647	0.132972	0.202951	0.15663	1.81046	0.096128	0.280085	0.099027	0.685887	3.731	17.7158	7.89398	0.700739	1.99667	0.516567	1.71119	2.11176	1.32024	1.51517
TC0100003585.rn.1	"cytochrome P450, family 2, subfamily c, polypeptide 24"	Cyp2c24	4.1541	3.63128	6.05169	3.30362	1.92683	3.11251	2.11612	2.33927	2.24651	1.15827	0.684362	0.999313	1.82462	1.73899	1.67317	1.06871	4.14772	2.75034	2.59489
TC1100001888.rn.1	histidine-rich glycoprotein	Hrg	0.714221	1.15117	1.13903	1.08223	0.53249	2.12562	1.58813	3.1112	2.9499	0.747092	0.653594	1.19305	1.65706	1.92544	2.55275	2.6129	1.12289	1.57369	2.06284
TC0200000139.rn.1	acyl-CoA thioesterase 12	Acot12	1.4415	3.15188	2.46948	2.25663	1.00893	2.21001	2.11601	2.97132	1.85402	1.2654	1.10208	1.14975	1.83771	2.33058	2.61616	1.99483	0.939072	2.33907	3.23685
TC1100000996.rn.1	proline dehydrogenase (oxidase) 1	Prodh	1.00833	2.11175	1.32938	2.08795	1.0556	2.45283	2.56559	3.10179	2.03426	1.36232	1.17901	1.07151	2.13783	1.73984	2.03474	1.81026	1.63384	2.22123	1.58344
TC0200001316.rn.1	Y-linked testis-specific protein 1-like	LOC100911005	1.40401	0.80331	1.15016	0.99709	0.810616	0.416986	0.336573	0.59079	1.02555	2.72392	5.16296	3.44483	1.1306	2.85318	0.830645	1.74231	2.80658	1.07616	2.17821
TC0800000478.rn.1	ENCODES a protein that exhibits G-protein coupled receptor activity (inferred) AND olfactory receptor activity (inferred) AND INVOLVED IN detection of chemical stimulus involved in sensory perception of smell (inferred) AND G-protein coupled receptor signaling pathway (inferred) AND FOUND IN integral component of membrane (inferred) AND plasma membrane (inferred)	Olr1265	2.72472	0.889343	1.29027	0.655527	3.88402	0.380366	0.59116	0.356114	0.873836	2.24475	3.86529	1.96276	0.879291	1.19642	0.478376	1.42302	1.69878	1.71624	1.37281
TC1200000059.rn.1	similar to Cd209e antigen	LOC688926	2.25147	1.01473	1.15777	0.786157	1.86078	0.622073	1.0923	0.54455	0.816057	1.66279	5.28606	1.24966	1.41268	1.10159	0.930255	1.67635	1.65865	1.78731	1.38871
TC1400001176.rn.1	microRNA 216b	Mir216b	0.937778	0.981926	0.555214	0.522016	1.09535	0.280827	0.758494	0.421117	0.719117	1.93875	2.32982	1.13888	0.65377	0.800868	0.83448	2.09865	1.76147	1.54873	2.86615
TC0400003908.rn.1	ENCODES a protein that exhibits G-protein coupled receptor activity (inferred) AND INVOLVED IN sensory perception of taste (inferred) AND FOUND IN integral to membrane (inferred)	LOC100360076	1.04485	0.974542	0.623571	0.707134	1.23621	0.617649	0.766417	0.678914	1.44441	0.751015	2.68605	1.53441	0.888252	1.26826	0.466404	1.91305	1.85112	1.33738	1.61822
TC0800001755.rn.1	glutamine-rich protein 2-like	LOC102547262	1.18975	0.948897	1.07993	0.761357	1.13432	0.798085	0.868829	0.786347	0.830625	1.33567	1.73968	1.00801	1.02321	0.716377	0.819967	1.62177	1.57638	1.28147	2.1006
TC0500002871.rn.1	ring finger protein 183	Rnf183	0.360329	0.525304	0.545037	0.481	0.382126	1.32819	0.872743	1.2445	0.867866	0.613261	0.50574	0.539942	0.547449	0.618682	0.924615	1.11775	1.88146	2.22443	1.98097
TC1400000318.rn.1	similar to Expressed sequence AI788959	RGD1559459	0.338315	0.450754	0.496679	0.523739	0.478733	0.950524	0.510262	1.1056	1.04164	0.644811	0.829811	0.695543	0.995961	0.909804	1.19263	1.95853	1.12848	1.60075	1.96611
TC0300002201.rn.1	"protein phosphatase 1, regulatory subunit 16B"	Ppp1r16b	0.250682	0.598011	0.441692	0.460298	0.218868	0.84633	0.605596	1.07406	0.574257	0.392622	0.506049	0.561205	0.971796	0.830808	1.0661	2.22953	1.44284	1.58416	2.53233
TC0700001592.rn.1	peroxisome proliferator activated receptor alpha	Ppara	0.347919	0.657078	0.568059	0.601215	0.436363	0.922008	0.853158	1.01847	0.636099	0.352661	0.465051	0.580222	0.898975	0.749335	0.966322	2.11052	1.14783	1.21099	2.18691
TC0100001023.rn.1	carcinoembryonic antigen-related cell adhesion molecule 20	Ceacam20	0.679247	0.772307	0.635283	0.80519	0.638622	0.438381	0.277118	0.518429	0.603306	0.417496	0.452907	0.45348	0.574093	0.445398	0.39169	1.38494	1.13435	2.5656	2.24898
TC0600002788.rn.1	"solute carrier family 10 (sodium/bile acid cotransporter), member 1"	Slc10a1	0.389049	0.392194	0.429148	0.354919	0.220766	0.546255	0.432035	0.391822	0.503123	0.48885	0.297433	0.447674	0.511701	0.483437	0.653379	1.51621	1.66353	1.76387	1.75667
TC0100000336.rn.1	naked cuticle homolog 2 (Drosophila)	Nkd2	0.485903	0.777523	0.544453	0.743797	0.397044	0.794747	0.887129	0.925179	0.608917	0.473602	0.346095	0.331136	0.70932	0.567793	0.659811	1.15093	1.87979	2.02366	2.1133
TC0400002990.rn.1	GPRIN family member 3	Gprin3	0.467322	0.715656	0.649334	0.858924	0.478235	0.584879	0.517138	0.714537	0.437039	0.370873	0.452835	0.468587	0.625471	0.409106	0.824354	1.64626	1.32974	1.37597	2.12315
TC0600000161.rn.1	serine/arginine-rich splicing factor 5	Srsf5	0.511957	1.04377	0.974834	1.24638	0.548365	1.70814	1.26829	1.46508	0.959757	0.594967	0.344116	0.492048	0.662074	0.614672	0.917498	1.32665	1.90437	1.72108	1.5101
TC1200001358.rn.1	MLX interacting protein-like	Mlxipl	0.671448	1.05894	0.869312	1.77401	0.704792	1.25372	1.41697	1.87821	1.32594	0.622565	0.533066	0.468914	1.17644	0.84591	0.870794	1.41689	1.83561	2.1361	1.79882
TC0500002944.rn.1	INTERACTS WITH (-)-epigallocatechin 3-gallate (ortholog) AND 17beta-estradiol (ortholog) AND 2 3 7 8-tetrachlorodibenzodioxine (ortholog)	LOC683573	0.572008	1.84913	0.90258	1.36636	0.476644	1.55546	1.23587	1.4715	0.568164	0.830415	0.34754	0.705327	0.929854	0.731298	1.51056	1.63419	1.50065	1.43488	2.67422
TC1800001689.rn.1	mitogen-activated protein kinase 4	Mapk4	0.443079	1.42129	0.805212	1.10456	0.408407	1.69513	1.74428	2.29574	1.20952	0.673992	0.521465	0.562288	1.28371	1.08849	2.62293	1.64928	1.12989	1.63506	2.3016
TC0400003224.rn.1	camello-like 3	Cml3	0.69006	0.900192	0.745051	0.783648	0.780088	0.985535	1.03347	1.07802	0.735672	0.564606	0.726961	0.550526	1.84201	1.12201	0.99226	1.74482	1.51335	1.18652	2.00726
TC0100001880.rn.1	"solute carrier family 28 (concentrative nucleoside transporter), member 1"	Slc28a1	0.762198	0.854081	0.75447	1.02918	0.89455	0.792808	0.951438	0.977071	0.962849	0.726497	0.952437	0.853562	1.14479	1.079	1.2632	1.68271	1.50974	1.2915	2.2043
TC1600001428.rn.1	lysophosphatidic acid receptor 2	Lpar2	0.875414	1.18631	0.907208	1.27397	0.99428	0.889267	0.910728	0.957794	1.17883	0.996488	0.865959	0.719901	1.20132	0.844128	0.960774	1.96255	1.33361	1.35207	1.821
TC0X00000330.rn.1	S100 calcium binding protein G	S100g	0.865036	1.02465	1.16345	0.7504	0.714139	1.14841	0.994746	0.902265	0.671203	1.05741	0.841854	0.683614	1.01155	1.17374	1.23199	1.83337	1.3663	1.57122	3.12621
TC1500002140.rn.1	regulator of cell cycle	Rgcc	0.60921	1.45159	1.05014	0.836966	0.503563	1.0464	0.90879	1.0751	0.709867	0.974178	0.875219	0.751813	1.16308	1.06188	1.42245	1.85857	1.64861	1.2345	2.26407
TC0200001678.rn.1	leucine rich repeat and Ig domain containing 4	Lingo4	0.605538	0.6009	0.596076	0.635515	0.666418	0.619265	0.720763	0.621316	0.730129	0.7719	0.687833	0.644338	0.774855	0.882929	0.785775	1.67846	1.12234	1.46263	2.47553
TC0500002714.rn.1	bile acid CoA: amino acid N-acyltransferase (glycine N-choloyltransferase)	Baat	0.541431	0.612062	0.617084	0.474338	0.706581	0.963347	0.758664	0.925267	1.14025	0.998385	0.882348	0.776798	0.447189	0.759217	0.91476	0.955492	1.34452	2.27598	2.3909
TC0100004932.rn.1	apolipoprotein C-II	Apoc2	0.716634	0.638413	0.809572	0.64471	0.412097	0.795641	0.802226	0.606728	1.04143	0.665394	0.821234	0.940027	1.36316	0.935446	1.04971	1.65857	3.8958	3.37204	3.31677
TC0800002484.rn.1	zinc finger and BTB domain containing 16	Zbtb16	0.549183	0.496323	0.598583	0.576602	0.619911	0.568512	0.90358	0.995043	0.757015	0.930356	1.73258	1.06864	1.21883	1.12395	1.32396	1.21066	2.53268	1.31999	1.73754
TC0500001969.rn.1	ERBB receptor feedback inhibitor 1	Errfi1	1.46893	1.18697	1.95741	0.908607	1.07684	0.943857	1.13901	0.79662	0.408073	0.376785	0.302457	0.46028	1.01821	0.707312	0.943062	1.92323	1.57836	1.76648	1.2848
TC1500000054.rn.1	"potassium channel, subfamily K, member 5"	Kcnk5	0.895946	1.06237	1.08393	0.961723	0.647924	0.669838	0.888355	0.920374	0.709339	0.389294	0.360618	0.441459	0.679946	0.633038	0.798834	1.68307	1.10735	1.82742	1.82983
TC0200001563.rn.1	"pyruvate kinase, liver and RBC"	Pklr	1.42497	1.68916	1.69121	2.22968	1.09932	0.811671	0.792758	0.987506	0.865523	0.385994	0.39257	0.466347	0.987973	0.901843	0.770535	1.42607	1.80196	1.97876	2.19339
TC1000003335.rn.1	"solute carrier family 13 (sodium-dependent dicarboxylate transporter), member 2"	Slc13a2	1.30209	1.45868	1.4331	2.01054	0.974106	0.781763	1.01409	0.874112	1.0383	0.574214	0.630756	0.537058	1.06584	1.01004	0.81471	1.83352	1.10025	1.29175	2.49833
TC1000003551.rn.1	similar to hepatic leukemia factor	Hlf	1.01994	1.27645	1.32589	1.5784	1.0877	1.23954	1.12065	1.03181	0.867712	0.58394	0.746501	0.857223	1.38595	1.29307	0.939988	1.76887	1.65815	1.28173	2.28505
TC1000002914.rn.1	"small nucleolar RNA, H/ACA box 17"	Snora17	2.7503	0.779783	0.919912	1.66093	1.61627	0.784683	1.18093	1.18088	1.13032	0.819747	1.06259	1.01443	1.02239	0.753522	0.978175	1.75544	1.47632	1.32938	1.86337
TC1300001421.rn.1	renin	Ren	1.12965	1.71355	1.50603	1.48902	1.11388	1.51385	1.44897	1.26798	1.18424	1.11469	0.870778	0.905832	0.713131	1.15198	1.06981	2.2485	2.53148	2.86259	3.90811
TC0100007260.rn.1	dihydroxyacetone kinase 2 homolog (S. cerevisiae)	Tkfc	1.72269	1.57457	1.91452	1.82734	1.3645	1.05687	1.12624	1.28592	1.18722	0.706915	0.770152	0.776665	1.00996	1.21282	1.03116	1.48107	1.41309	1.71231	2.03877
TC0500001955.rn.1	"solute carrier family 2 (facilitated glucose/fructose transporter), member 5"	Slc2a5	1.89978	1.94975	1.79766	1.91738	1.27567	1.36143	1.37436	1.31436	1.34921	0.734989	0.99038	0.916706	1.26991	1.45117	1.4191	1.40177	1.83125	2.57611	1.95403
TC1000004296.rn.1	fatty acid synthase	Fasn	1.14176	1.80584	1.35303	1.93522	1.19805	1.4873	1.36172	1.58895	1.17652	0.723514	0.905741	0.838052	1.29192	1.13554	1.34624	1.22481	1.87915	2.47091	1.81665
TC1000001027.rn.1	spermatogenesis associated 22	Spata22	1.06219	0.93506	1.81325	1.01678	0.648929	1.71154	1.99773	1.63017	1.1861	1.24719	1.13068	1.36663	1.33858	1.72449	1.19243	1.84404	1.77256	1.43497	3.19719
TC0600002277.rn.1	"solute carrier family 26 (anion exchanger), member 4"	Slc26a4	1.22237	1.27844	1.03749	1.39341	1.01704	1.58942	1.60594	1.5487	1.70891	0.690699	0.815415	0.986379	1.33885	1.42823	1.37263	1.74924	1.53686	1.88301	1.3462
TC1300001777.rn.1	flavin containing monooxygenase 2	Fmo2	0.81562	1.27495	0.974512	0.983762	0.659699	1.62889	1.72009	1.7878	1.47308	0.717874	0.836322	0.796017	1.50982	1.2276	1.55421	2.08458	1.69202	1.59245	1.72054
Genes with decreased expression in kidney after Runcaciguat treatment of ZSF1 obese rats
Probeset_ID	GeneDescription	GeneSymbol(na36)	ZSF1lean-vs-ZSF1ob_wk14, An28	ZSF1lean-vs-ZSF1ob_wk14, An27	ZSF1lean-vs-ZSF1ob_wk14, An29	ZSF1lean-vs-ZSF1ob_wk14, An30	ZSF1lean-vs-ZSF1ob_wk14, An26	ZSF1lean-vs-ZSF1ob_wk22, An24	ZSF1lean-vs-ZSF1ob_wk22, An23	ZSF1lean-vs-ZSF1ob_wk22, An22	ZSF1lean-vs-ZSF1ob_wk22, An21	ZSF1lean-vs-ZSF1ob_wk22, An25	ZSF1lean-vs-ZSF1ob_wk26, An20	ZSF1lean-vs-ZSF1ob_wk26, An18	ZSF1lean-vs-ZSF1ob_wk26, An19	ZSF1lean-vs-ZSF1ob_wk26, An16	ZSF1lean-vs-ZSF1ob_wk26, An17	Runca(ZSF1ob)-vs-ZSF1ob, An44	Runca(ZSF1ob) vs ZSF1ob, An46	Runca(ZSF1ob) vs ZSF1ob, An45	Runca(ZSF1ob) vs ZSF1ob, An50
TC0500003177.rn.1	cytochrome P450 2J5-like	LOC100911891	11.2154	7.84528	20.5208	11.9814	8.73592	5.27883	4.41596	7.99284	4.76773	1.70911	3.26227	3.42376	7.69088	5.05601	4.02593	0.254221	0.574032	0.273927	0.349982
TC0600002936.rn.1	putative preoptic regulatory factor 1-like	Porf1	1.83248	3.37929	1.92101	5.52473	1.91442	2.11972	1.68322	1.73995	1.66942	0.872359	1.67161	1.7345	2.41335	1.18746	2.27811	0.852769	0.552692	0.475244	0.380685
TC0600002937.rn.1	"deiodinase, iodothyronine, type II"	Dio2	2.22409	2.31732	2.94041	3.84378	3.23156	2.05426	1.86789	2.13328	1.66483	1.43283	2.56214	1.29862	4.12702	2.64783	2.69278	0.415307	0.512893	0.664199	0.607856
TC1400001322.rn.1	secreted phosphoprotein 1	Spp1	0.105858	0.120645	0.118112	0.0932557	0.0743144	0.0562069	0.0454688	0.0457395	0.0324459	0.0382461	0.030201	0.0452234	0.0638017	0.0531174	0.046131	0.442288	0.593015	0.554875	0.526394
TC2000001816.rn.1	complement component 4B (Chido blood group)complement component 4A (Rodgers blood group)	LOC103689965	0.101077	0.156728	0.121692	0.203388	0.129196	0.107006	0.106306	0.106716	0.109454	0.0526788	0.0494974	0.0589555	0.0916302	0.0702122	0.104967	0.470304	0.654236	0.523839	0.698806
TC2000001814.rn.1	complement C4-like	C4a	0.128937	0.184146	0.139384	0.226474	0.164688	0.132733	0.12737	0.129851	0.141576	0.0826297	0.0746305	0.0805116	0.107007	0.0863782	0.119299	0.487061	0.650928	0.525084	0.695809
TC2000001815.rn.1	complement component 4B (Chido blood group)	C4b	0.125806	0.174853	0.142549	0.210786	0.176235	0.125438	0.122991	0.124337	0.132368	0.0918219	0.0840557	0.0788985	0.102846	0.0837186	0.111502	0.416412	0.570591	0.473094	0.624365
TC1500000354.rn.1	T cell receptor alpha variable 10D	LOC100359747	1.14731	0.601981	0.543469	0.950823	0.746695	0.727915	0.689782	0.9842	0.76652	1.25624	2.24673	1.33349	0.954811	0.755915	0.779844	0.580724	0.465504	1.00746	0.510779
TC1600001281.rn.1	hypothetical gene supported by AF152002	LOC290595	2.12258	1.01744	0.749732	0.918457	0.992627	0.631299	0.507895	0.402417	0.554583	1.83164	1.48759	1.50648	0.504104	0.569675	0.524676	0.475824	0.748199	0.551705	0.645721
TC1200001882.rn.1	INVOLVED IN signal transduction (ortholog) AND FOUND IN extracellular vesicular exosome (ortholog) AND INTERACTS WITH 2 3 7 8-tetrachlorodibenzodioxine AND 6-propyl-2-thiouracil AND cisplatin	LOC685020	0.831565	0.607463	0.799209	0.612076	1.00038	0.495424	0.519537	0.38622	0.764419	1.35102	1.10278	0.929478	0.416186	0.71714	0.488866	0.668717	0.643661	0.6369	0.51522
TC1000004199.rn.1	suppressor of cytokine signaling 3	Socs3	0.966502	0.685494	0.858824	0.709608	1.06612	0.485796	0.544768	0.610418	0.588595	0.809062	1.06833	0.871934	0.542086	0.594126	0.682664	0.511952	0.404497	0.482301	0.444574
TC0400001713.rn.1	alpha-2-macroglobulin	A2m	0.850489	0.655221	0.742621	0.559817	0.962059	0.479278	0.498585	0.448373	0.619715	0.818613	0.914652	0.810431	0.585889	0.545958	0.446828	0.653515	0.501734	0.531713	0.503229
TC0400004146.rn.1	"alpha-2-macroglobulin (A2m), mRNA "	A2m	0.918355	0.677006	0.771308	0.594094	0.98248	0.496541	0.523993	0.466259	0.670286	0.901523	0.977134	0.912629	0.60115	0.573451	0.485294	0.699903	0.539741	0.554481	0.541061
TC0500000605.rn.1	"collagen, type XV, alpha 1"	Col15a1	0.802404	0.652653	0.710547	0.65765	0.821182	0.670731	0.759336	0.612833	0.765711	0.837134	0.859566	0.887007	0.504563	0.682459	0.626129	0.653983	0.624246	0.515467	0.518366
TC0500000627.rn.1	"collagen, type XV, alpha 1"	Col15a1	0.869709	0.635272	0.721238	0.654321	0.888689	0.68605	0.756421	0.621778	0.781411	0.90122	0.93259	0.973309	0.554033	0.711017	0.644625	0.671365	0.64863	0.534095	0.533068
TC0100001863.rn.1	protein regulator of cytokinesis 1	Prc1	0.819427	0.91332	0.65015	0.637631	0.920793	0.577309	0.634403	0.533373	0.691543	0.864025	0.723253	0.832231	0.503506	0.555382	0.629409	0.473669	0.61105	0.669391	0.499069
TC1000002592.rn.1	hyaluronan mediated motility receptor (RHAMM)	Hmmr	1.0228	0.87107	0.768985	0.79074	0.925114	0.637331	0.648285	0.691087	0.783985	0.930301	0.76138	0.799324	0.538576	0.706557	0.709751	0.647918	0.617019	0.598808	0.610783
TC0100002530.rn.1	polo-like kinase 1	Plk1	0.831274	0.772793	0.783875	0.696014	0.936627	0.602071	0.705494	0.628957	0.708397	0.806808	0.746033	0.673359	0.607986	0.571704	0.538139	0.603354	0.63833	0.637282	0.57248
TC1800000265.rn.1	kinesin family member 20A	Kif20a	0.961913	0.955806	0.632875	0.659678	0.91231	0.609032	0.627291	0.689276	0.730841	0.979102	0.875998	0.784706	0.620231	0.639308	0.542165	0.579211	0.65323	0.68116	0.522239
TC1900000819.rn.1	null	LOC678766	0.943142	1.03744	0.854442	0.754915	1.53781	0.434979	0.627416	0.534128	0.707222	1.01595	0.838114	1.15441	0.901468	0.732662	0.635681	0.532226	0.605825	0.499666	0.551298
TC0100000594.rn.1	SPARC related modular calcium binding 2	Smoc2	0.911626	1.24893	0.93036	0.867583	0.987009	0.87992	0.731834	0.817073	0.600063	0.984119	0.775904	0.75693	0.753748	0.585029	0.808191	0.573894	0.639581	0.577562	0.479861
TC0600001745.rn.1	"cytochrome P450, family 1, subfamily b, polypeptide 1"	Cyp1b1	1.09272	0.973367	0.857292	0.714948	0.960212	0.79965	0.561848	0.439781	0.663271	0.97478	0.731841	0.552559	0.600274	0.626405	0.583704	0.549491	0.572693	0.56378	0.555062
TC1700000639.rn.1	INTERACTS WITH (-)-demecolcine (ortholog) AND bicalutamide (ortholog) AND copper(2+) sulfate (ortholog)	LOC102549061	1.08059	0.749411	1.04974	0.939489	0.582943	0.896345	1.45241	0.903604	0.687004	0.846323	0.7195	1.25059	0.801585	0.843391	0.690701	0.623223	0.50154	0.541982	0.704397
TC0300004820.rn.1	"UDP-Gal:betaGlcNAc beta 1,4-galactosyltransferase, polypeptide 5"	B4galt5	0.753283	0.899772	0.834835	0.894245	0.820252	0.675133	0.707721	0.943716	0.579251	0.75225	0.551828	0.593426	0.592132	0.570416	0.925223	0.588181	0.379029	0.480112	0.6724
TC1800001211.rn.1	neuronal regeneration related protein	Nrep	0.567875	0.597832	0.574594	0.605398	0.548042	0.922068	0.924146	0.957029	0.890726	0.723905	0.648913	0.637118	0.618452	0.69612	0.827606	0.465758	0.703762	0.679997	0.588576
TC1900001053.rn.1	matrix metallopeptidase 2	Mmp2	0.595641	1.13998	0.952473	0.870365	0.649764	1.05226	0.961445	0.880238	0.678168	0.719171	0.575207	0.627836	0.584754	0.637261	1.05217	0.689161	0.524288	0.543354	0.522867
TC0400000308.rn.1	"collagen, type I, alpha 2"	Col1a2	0.538391	0.989194	0.744496	0.745971	0.679453	0.995029	0.982908	0.877178	0.794971	0.87467	0.530668	0.50007	0.520819	0.531344	0.768972	0.742816	0.675202	0.490519	0.384464
TC0400000332.rn.1	"collagen, type I, alpha 2 (Col1a2), mRNA "	Col1a2	0.522802	0.984308	0.730099	0.737586	0.644558	1.0101	0.967651	0.884704	0.768094	0.860636	0.49996	0.468492	0.512055	0.518976	0.759369	0.739288	0.674963	0.481136	0.381347
TC1700002061.rn.1	"aldo-keto reductase family 1, member C14"	Akr1c14	1.12109	1.39076	1.68398	1.31892	0.777537	0.895614	0.897832	0.939517	0.550959	0.411231	0.471443	0.393815	0.658349	0.574119	0.624144	0.323831	0.563863	0.426914	0.447499
TC0600003070.rn.1	"serpin peptidase inhibitor, clade A (alpha-1 antiproteinase, antitrypsin), member 10"	Serpina10	0.735521	0.866627	0.927127	0.944112	0.783426	0.714968	0.674818	0.608868	0.426905	0.3945	0.340041	0.367243	0.543731	0.580714	0.590989	0.383268	0.552618	0.52003	0.530517
TC0800001293.rn.1	"procollagen lysine, 2-oxoglutarate 5-dioxygenase 2"	Plod2	0.818781	1.76526	1.17957	1.34247	0.818838	0.77526	0.714283	0.63131	0.428561	0.379145	0.230578	0.314651	0.78942	0.50706	0.71882	0.637189	0.615245	0.552482	0.567318
TC0200002935.rn.1	follistatin	Fst	1.14853	1.43418	1.50647	1.74479	1.32921	0.611866	0.58707	0.595132	0.654917	0.604613	0.67825	0.991236	1.17362	0.784205	0.943133	0.600448	0.612492	0.427089	0.576871
TC0400002826.rn.1	" 4.5S RNA (Rn4.5s), ribosomal RNA., 4.5S RNA (Rn4.5s), ribosomal RNA."	MGI:97946	0.736013	1.01225	0.931448	1.84518	0.91604	0.841261	1.33338	1.43658	1.0412	0.440793	0.622851	0.467817	1.28927	0.5002	0.713979	0.345717	0.649655	0.378247	0.362884
TC0200002136.rn.1	complement factor I	Cfi	0.256283	0.357259	0.320378	0.302213	0.277332	0.279803	0.206034	0.309563	0.246648	0.224368	0.159395	0.155786	0.190182	0.182352	0.241061	0.346955	0.28275	0.367458	0.409391
TC0200003226.rn.1	carbonic anhydrase 3	Car3	0.378709	0.285507	0.343532	0.342048	0.376724	0.266083	0.276054	0.267552	0.322981	0.34274	0.213257	0.250322	0.213124	0.210012	0.212261	0.545631	0.425423	0.342219	0.394826
TC0400000875.rn.1	glycoprotein (transmembrane) nmb	Gpnmb	0.322667	0.346304	0.261149	0.296513	0.433357	0.215247	0.239105	0.210002	0.293201	0.356491	0.224232	0.164695	0.17615	0.156733	0.165176	0.471138	0.383429	0.468751	0.554899
TC0900002193.rn.1	fibronectin 1	Fn1	0.223459	0.582853	0.526726	0.457671	0.279133	0.384352	0.280443	0.261346	0.150732	0.147206	0.101243	0.106246	0.217862	0.121256	0.298094	0.477458	0.472686	0.341009	0.411594
TC1300000466.rn.1	"family with sequence similarity 129, member A"	Fam129a	0.210874	0.320628	0.262488	0.417829	0.230975	0.228591	0.211929	0.206609	0.149688	0.103417	0.110055	0.125354	0.227093	0.159731	0.203756	0.534285	0.689774	0.577018	0.571739
TC0200000528.rn.1	thymosin beta-10-like	LOC100911590	0.378066	0.509799	0.613667	0.612247	0.237444	0.906539	0.554357	0.638484	0.617568	0.212342	0.226843	0.136517	0.311549	0.282014	0.382669	0.475743	0.50995	0.851661	0.527869
TC0900001949.rn.1	thymosin beta-10-like	LOC102549727	0.553939	0.606693	0.581689	0.657789	0.261984	0.996219	0.647835	0.710676	0.513828	0.283595	0.186679	0.147003	0.342922	0.275584	0.360715	0.402307	0.493943	0.784973	0.519507
TC0400000484.rn.1	thymosin beta-10-like	LOC100909821	0.310468	0.506959	0.524512	0.49288	0.115296	0.601295	0.548363	0.523178	0.420099	0.10353	0.141464	0.153535	0.249898	0.287129	0.320336	0.507592	0.660964	0.686387	0.536199
TC0500002605.rn.1	"thymosin beta 4, X-linked (Tmsb4x), mRNA."	Tmsb4x	0.332073	0.499332	0.76219	0.411172	0.14762	0.805287	0.714955	0.494634	0.278061	0.11297	0.111668	0.1948	0.299822	0.218925	0.452931	0.523065	0.538855	0.681141	0.53189
TC1000001421.rn.1	thymosin beta 10-like	LOC100359496	0.385599	0.412379	0.548066	0.320263	0.209097	0.53847	0.559536	0.409827	0.382105	0.207402	0.172975	0.2108	0.272961	0.332583	0.347445	0.621325	0.561115	0.617853	0.636792
TC0100005722.rn.1	thymosin beta 10-like	LOC100361392	0.378398	0.419067	0.545162	0.442189	0.194183	0.620741	0.620959	0.535351	0.410843	0.170348	0.126736	0.118331	0.270242	0.256677	0.327742	0.545146	0.61343	0.731459	0.464764
TC0400004123.rn.1	ENCODES a protein that exhibits actin binding (inferred) AND INVOLVED IN actin cytoskeleton organization (inferred) AND sequestering of actin monomers (inferred) AND FOUND IN cytoplasm (inferred)	LOC100361596	0.294541	0.428748	0.612576	0.422898	0.228654	0.678922	0.626158	0.561705	0.341456	0.241163	0.102085	0.150399	0.239823	0.222745	0.378615	0.451564	0.585616	0.738461	0.524478
TC0100006841.rn.1	marker of proliferation Ki-67	Mki67	0.429332	0.669755	0.435119	0.554164	0.522887	0.427351	0.428253	0.35563	0.371734	0.355268	0.23488	0.263129	0.374705	0.324682	0.352441	0.410465	0.468263	0.399165	0.398296
TC0400001135.rn.1	thymosin beta 10-like	LOC100359493	0.398141	0.592926	0.56778	0.401191	0.367259	0.417091	0.431421	0.463006	0.376733	0.388445	0.193939	0.196936	0.252389	0.291096	0.334633	0.560456	0.580484	0.582246	0.552102
TC1000001226.rn.1	chemokine (C-C motif) ligand 2	Ccl2	0.40734	0.308063	0.621148	0.248795	0.301581	0.390787	0.37664	0.257822	0.297551	0.346317	0.261313	0.223362	0.241069	0.253424	0.393899	0.651264	0.417952	0.393134	0.445579
TC0300002875.rn.1	lipocalin 2	Lcn2	0.578232	0.331364	0.484661	0.376418	0.527641	0.291262	0.319518	0.230284	0.293736	0.397479	0.346964	0.307021	0.237844	0.266326	0.215362	0.395368	0.469859	0.499712	0.481073
TC0800000042.rn.1	matrix metallopeptidase 12	Mmp12	0.485765	0.409108	0.462973	0.37053	0.468559	0.30025	0.348069	0.317548	0.384265	0.452587	0.382836	0.460183	0.248992	0.306191	0.285341	0.535094	0.495451	0.41131	0.484441
TC1100001209.rn.1	"ADAM metallopeptidase with thrombospondin type 1 motif, 1"	Adamts1	0.519818	0.50919	0.486111	0.435244	0.485133	0.278003	0.325949	0.332444	0.224058	0.137119	0.173278	0.254385	0.274666	0.264142	0.268816	0.295933	0.350098	0.277741	0.304499
TC1000002654.rn.1	T-cell immunoglobulin and mucin domain containing 2	Timd2	0.30068	0.448848	0.466688	0.59771	0.317614	0.435142	0.30385	0.399359	0.344035	0.192198	0.149753	0.179223	0.357611	0.282175	0.312495	0.325582	0.501311	0.557249	0.657866
TC1400001885.rn.1	"solute carrier family 34 (type II sodium/phosphate contransporter), member 2"	Slc34a2	0.511741	0.509443	0.499407	0.635519	0.47109	0.258657	0.259826	0.289644	0.280389	0.166957	0.1696	0.179301	0.240571	0.223688	0.213153	0.508753	0.58512	0.542151	0.582857
TC1300001371.rn.1	interleukin 24	Il24	0.413173	0.33896	0.441625	0.301811	0.670611	0.199525	0.262954	0.170325	0.286826	0.331269	0.435361	0.454783	0.162051	0.257535	0.164622	0.181126	0.195125	0.212269	0.28542
TC1300001373.rn.1	interleukin 19	Il19	0.48873	0.467268	0.422753	0.400976	0.587002	0.347397	0.307123	0.276053	0.331769	0.466175	0.54309	0.422643	0.347393	0.401289	0.168025	0.319772	0.259799	0.304629	0.264478
TC1200001881.rn.1	paired immunoglobin-like type 2 receptor alpha		0.458173	0.268436	0.428535	0.424678	0.752645	0.364448	0.402792	0.380688	0.619267	0.546432	0.388508	0.638627	0.293638	0.387875	0.182825	0.639075	0.563676	0.351368	0.649201
TC0200003938.rn.1	lecithin-retinol acyltransferase (phosphatidylcholine-retinol-O-acyltransferase)	Lrat	0.453921	0.620594	0.534083	0.374757	0.664846	0.487637	0.464042	0.411956	0.412993	0.855926	0.48891	0.66689	0.679734	0.540012	0.428756	0.488194	0.51672	0.277796	0.505369
TC0800001322.rn.1	procollagen C-endopeptidase enhancer 2	PCOLCE2	0.496252	0.484333	0.432943	0.360304	0.449369	0.375988	0.609413	0.364439	0.434612	0.418958	0.472374	0.649344	0.505948	0.456944	0.505806	0.537231	0.648433	0.567064	0.708103
TC1100000453.rn.1	"collagen, type VIII, alpha 1"	Col8a1	0.652372	0.328639	0.450377	0.398813	0.520351	0.499366	0.527098	0.384989	0.558741	0.80191	0.838219	0.651736	0.384374	0.481268	0.300988	0.550233	0.5987	0.483052	0.527996
TC0900000594.rn.1	"collagen, type III, alpha 1"	Col3a1	0.553307	0.812459	0.648501	0.619196	0.572255	0.770947	0.698682	0.623423	0.564815	0.64007	0.47216	0.449773	0.40452	0.40889	0.577291	0.557748	0.575242	0.421595	0.293147
TC1000001453.rn.1	"collagen, type I, alpha 1"	Col1a1	0.574695	0.766312	0.57206	0.593124	0.769556	0.59461	0.658242	0.497008	0.621684	0.808576	0.572251	0.516456	0.381114	0.469773	0.488808	0.566819	0.524672	0.416705	0.282442
TC0200003382.rn.1	epithelial cell transforming 2	Ect2	0.839047	0.743616	0.749699	0.842603	0.863486	0.569624	0.524828	0.467262	0.553421	0.551286	0.408143	0.376825	0.529212	0.506043	0.431917	0.445676	0.460659	0.411376	0.455351
TC0200004002.rn.1	Fc receptor-like 2	Fcrl2	0.77661	0.776136	0.76797	0.836042	0.842699	0.572505	0.580245	0.586446	0.700966	0.665008	0.585173	0.441138	0.403569	0.538927	0.546054	0.586404	0.446986	0.519528	0.398294
TC0900002675.rn.1	TGFB-induced factor homeobox 1	Tgif1	0.705569	0.690413	0.746595	0.695745	0.579616	0.512695	0.617729	0.574953	0.654628	0.728143	0.512994	0.37352	0.473422	0.461069	0.512271	0.57073	0.502288	0.530662	0.558272
TC0100004167.rn.1	cyclin B2	Ccnb2	0.684312	0.617635	0.731172	0.576322	1.02782	0.479353	0.652748	0.62204	0.538381	0.604407	0.472854	0.546466	0.483264	0.792657	0.495453	0.506115	0.748568	0.733724	0.501742
TC0200003522.rn.1	cyclin A2	Ccna2	0.683949	0.726617	0.628892	0.581983	0.761567	0.590312	0.6085	0.634708	0.461899	0.601126	0.57977	0.570121	0.645906	0.5215	0.501171	0.669972	0.592597	0.611183	0.572757
TC1300002277.rn.1	Fc gamma receptor II beta	LOC498276	0.512206	0.75964	0.594827	0.590403	0.590625	0.584239	0.553725	0.614967	0.46808	0.573981	0.451703	0.64078	0.530293	0.507853	0.624587	0.521334	0.674827	0.592632	0.598336
TC1700002046.rn.1	Kruppel-like factor 6	Klf6	0.604341	0.666722	0.596171	0.615765	0.632601	0.514245	0.567406	0.587806	0.520965	0.496231	0.413264	0.473428	0.475623	0.476005	0.609092	0.611941	0.641645	0.52923	0.612112
TC0600000504.rn.1	ribonucleotide reductase M2	Rrm2	0.71655	0.711525	0.528275	0.508609	0.536723	0.585946	0.550501	0.479109	0.712118	0.648429	0.567629	0.52238	0.550681	0.680468	0.437101	0.574033	0.665977	0.570474	0.628582
TC1000003726.rn.1	topoisomerase (DNA) II alpha	Top2a	0.774932	0.711222	0.613367	0.517649	0.748352	0.493124	0.556106	0.506953	0.632938	0.77153	0.630821	0.565406	0.499872	0.530483	0.473133	0.509157	0.620457	0.477681	0.4481
TC0700001200.rn.1	myelocytomatosis oncogene	Myc	0.839993	0.692754	0.581561	0.624787	0.506952	0.340774	0.580395	0.486412	0.417901	0.526269	0.497266	0.388692	0.457734	0.522526	0.48065	0.50104	0.460066	0.447599	0.64279
TC2000000750.rn.1	"gap junction protein, alpha 1"	Gja1	0.935777	0.778997	0.739923	0.509151	0.741969	0.417757	0.537373	0.606356	0.407104	0.573373	0.565708	0.709047	0.668958	0.456215	0.526795	0.463287	0.493205	0.368428	0.384128
TC0100008028.rn.1	"transforming growth factor, beta 1"	Tgfb1	0.562625	0.910795	0.82249	0.882536	0.496222	0.598092	0.631348	0.552782	0.382516	0.290363	0.184982	0.27611	0.366525	0.274683	0.495055	0.744875	0.52984	0.508252	0.667701
TC0500001514.rn.1	"alpha 1,3-galactosyltransferase 2"	A3galt2	0.453436	0.750574	0.594455	0.691868	0.348858	0.610453	0.461865	0.493173	0.411104	0.343217	0.209609	0.264255	0.424029	0.320816	0.483491	0.555477	0.469997	0.463131	0.590148
TC0600003103.rn.1	"serpin peptidase inhibitor, clade A (alpha-1 antiproteinase, antitrypsin), member 10 (Serpina10), mRNA "	Serpina10	0.662885	0.805042	1.05261	0.843912	0.672554	0.758238	0.530124	0.567608	0.335009	0.244161	0.323342	0.206146	0.481246	0.469167	0.563809	0.369713	0.504975	0.48538	0.507152
TC1000002359.rn.1	"tumor necrosis factor receptor superfamily, member 12a"	Tnfrsf12a	0.776103	0.841497	0.83988	0.870165	0.497423	0.499694	0.453718	0.469001	0.355688	0.225228	0.311308	0.295173	0.472594	0.375303	0.439591	0.456167	0.524644	0.410722	0.584009
TC0500002905.rn.1	tenascin C	Tnc	0.494908	0.789122	0.75117	0.685174	0.538835	0.690468	0.5083	0.470814	0.495719	0.553408	0.375435	0.37259	0.329971	0.302968	0.460298	0.574278	0.414469	0.404236	0.604864
TC0300004073.rn.1	fibrillin 1	Fbn1	0.465896	0.849278	0.730724	0.682121	0.537172	0.92591	0.716129	0.738548	0.472199	0.561648	0.376894	0.410729	0.429428	0.409618	0.731031	0.633651	0.655166	0.556837	0.43076
TC1000000813.rn.1	"microfibrillar-associated protein 4 (Mfap4), mRNA "	Mfap4	0.425999	0.668756	0.618093	0.627167	0.549198	0.632447	0.78104	0.571571	0.699849	0.626945	0.46619	0.483688	0.384238	0.370471	0.681079	0.996587	0.566379	0.505673	0.482057
TC1700000242.rn.1	thymosin beta 10-like	LOC100361620	0.340378	0.529816	0.658072	0.651727	0.398367	0.98853	0.809998	0.786421	0.709043	0.420482	0.340345	0.313946	0.44198	0.449732	0.514815	0.496202	0.491363	0.6305	0.462361
TC0200004340.rn.1	mab-21-like 3 (C. elegans)	Mab21l3	0.354434	0.612752	0.42915	0.414745	0.391985	0.58895	0.650604	0.710367	0.489989	0.472458	0.277502	0.384816	0.300594	0.396267	0.568603	0.509096	0.460464	0.593468	0.675439
TC1300002278.rn.1	Fc gamma receptor II beta	LOC498276	0.382302	0.738966	0.673198	0.601441	0.309013	0.65713	0.562403	0.628784	0.450699	0.476214	0.27503	0.354384	0.348243	0.380861	0.571169	0.524592	0.634792	0.565178	0.578957
Abbreviations
ZSF1lean	ZSF1 lean animal
ZSF1ob	ZSF1 obese animal
wk	week
An	Animal number
Runca	Runcaciguat
